# Supplementary material for: A Novel Anticancer Peptide Derived from Bryopsis plumosa Regulates Proliferation and Invasion in Non-Small Cell Lung Cancer Cells
Source: MDPI journal article supplement (doi:10.3390/md21120607), 2023-11-24
Supplement: s1 [file s1]

## **A novel anticancer peptide derived from *Bryopsis plumosa* regulates proliferation and invasion in Non-Small Cell Lung Cancer cells**

**Heabin Kim<sup>1,†</sup>, Hyun-Taek Kim<sup>2,†</sup>, Seung-Hyun Jung<sup>1</sup>, Jong Won Han<sup>1</sup>, Seonmi Jo<sup>1</sup>, In-Gyu Kim<sup>3</sup>, Rae-Kwon Kim<sup>3,4</sup>, Yeon-Jee Kahm<sup>3,4</sup>, Tae-Ik Choi<sup>5</sup>, Cheol-Hee Kim<sup>5</sup> and Jei Ha Lee<sup>1,\*</sup>**

<sup>1</sup> Department of Genetic Resources, National Marine Biodiversity Institute of Korea, Seochon 33662, Republic of Korea.

<sup>2</sup> Soonchunhyang Institute of Medi-bio Science (SIMS), Soonchunhyang University, 31151 Cheonan-si, Republic of Korea.

<sup>3</sup> Department of Radiation Biology, Environmental Safety Assessment Research Division, Korea Atomic Energy Research Institute, Daejeon 34057, Republic of Korea.

<sup>4</sup> Department of Radiation Science and Technology, Korea University of Science and Technology, Daejeon 34113, Republic of Korea

<sup>5</sup> Department of Biology, Chungnam National University, Yuseong-gu, Daejeon 34134, Republic of Korea

\*Correspondence: [jeiha@mabik.re.kr](mailto:jeiha@mabik.re.kr);

E-mail: [jeiha@mabik.re.kr](mailto:jeiha@mabik.re.kr)

2 Figures, 2 Tables, Statistical Data

## Supplementary Figure S1

A

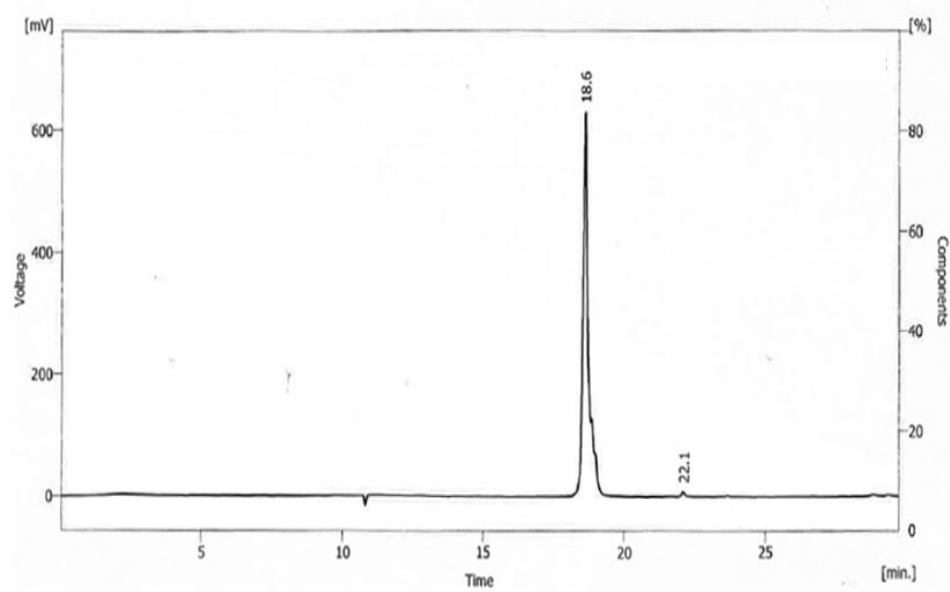

B

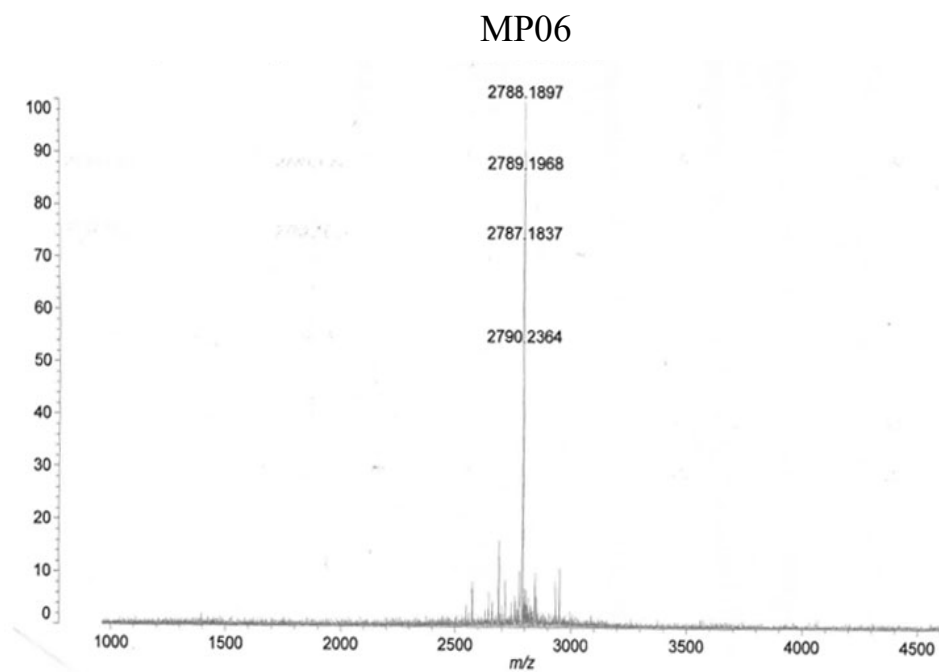

**Figure S1.** Chromatographic profiles(A) and mass spectra(B) for MP06 (theoretical 2788.18 Da). The peptide (LAVISWKCQEWNSLWKKRKRKT) was obtained using solid-phase peptide synthesis.

## Supplementary Figure S2

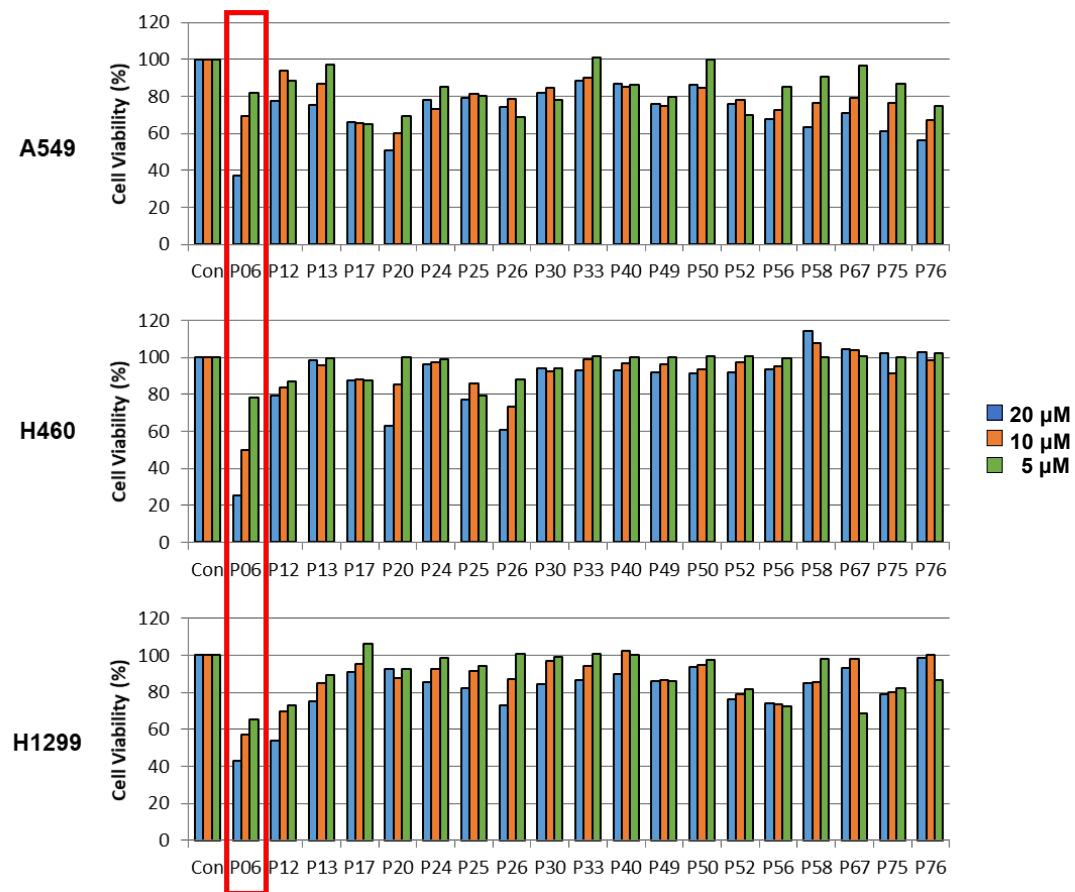

**Figure S2.** Screening of the anticancer peptide. Effect of predicted ACPs at a concentration of 20, 10 and 5 μM on the proliferation of NSCLCs for 48 h.

## Supplementary Table S1

**Table S1.** The list of predicted ACPs using the database

| Name | Query Pep Seq                               | Model1 prediction | Model1 score | Model2 prediction | Model2 score | AA number |
|------|---------------------------------------------|-------------------|--------------|-------------------|--------------|-----------|
| MP06 | LAVISWKCQEWNSLWKKRKRKT                      | Non-AntiCP        | 0.42         | AntiCP            | 0.57         | 22        |
| MP12 | GSSSWLPTFRHLFGCHSPEMTSHLLR                  | AntiCP            | 0.55         | Non-AntiCP        | 0.35         | 26        |
| MP13 | QDFVWSKCIQVRMGCPQRQKICW                     | AntiCP            | 0.49         | AntiCP            | 0.52         | 24        |
| MP17 | MEVTFGENLNPSLLRRMRRLAGVELSEVR               | AntiCP            | 0.48         | Non-AntiCP        | 0.08         | 30        |
| MP20 | MLWLHFFPLFQKIPFNIRNGFIGMFCSEKFMFKRKTFSWTMEK | AntiCP            | 0.5          | Non-AntiCP        | 0.43         | 43        |
| MP24 | PVSRSAKAGLQFPVGRIARYLKKGK                   | Non-AntiCP        | 0.4          | AntiCP            | 0.68         | 25        |
| MP25 | SFPAPTKPLKVVGAGLAGLSAAK                     | Non-AntiCP        | 0.43         | AntiCP            | 0.85         | 25        |
| MP26 | APYTTGEWKGCNVSCGAGVENR                      | Non-AntiCP        | 0.27         | AntiCP            | 0.55         | 22        |
| MP30 | LFLLSMTMVLGAAAPKDEFIDIEPVQK                 | AntiCP            | 0.51         | Non-AntiCP        | 0.1          | 28        |
| MP33 | LPGSRPKGESCCFTPAIF                          | Non-AntiCP        | 0.35         | AntiCP            | 0.66         | 18        |
| MP38 | SERFFFPECVLCVCLGSGEWGETK                    | Non-AntiCP        | 0.41         | AntiCP            | 0.48         | 25        |
| MP40 | QMTRSAKAGLQFPVGRIARYLKK                     | Non-AntiCP        | 0.43         | AntiCP            | 0.52         | 23        |
| MP49 | LDHQTVAKFMGIVISALGK                         | Non-AntiCP        | 0.27         | AntiCP            | 0.45         | 19        |
| MP50 | APRWSPARRAGHWWGRPLPDHTLPPPSCGTPPSC          | AntiCP            | 0.56         | AntiCP            | 0.56         | 34        |
| MP52 | MSCTHLGSTRRHLSPSLKCRCGGVS                   | Non-AntiCP        | 0.36         | AntiCP            | 0.54         | 25        |
| MP56 | DLPGRPDIAIYIGRRRAIFVHGCFWHGHDCK             | AntiCP            | 0.46         | Non-AntiCP        | 0.37         | 30        |
| MP58 | VYFNGCLPHQFCSSNKLLCNFLPLPLFH                | AntiCP            | 0.5          | AntiCP            | 0.47         | 28        |
| MP67 | PGTGLAHKACANLCLIGG                          | AntiCP            | 0.46         | AntiCP            | 0.73         | 18        |
| MP69 | MVIGAWCGASVRFFLVGCQVGC                      | AntiCP            | 0.5          | AntiCP            | 0.58         | 22        |
| MP75 | MTPYMRAAIACAALVALAAL                        | AntiCP            | 0.64         | Non-AntiCP        | 0.26         | 20        |
| MP76 | AIACAALVALAALGDARPVV                        | AntiCP            | 0.5          | Non-AntiCP        | 0.24         | 20        |

## Supplementary Table S2

**Table S2.** Primer sequences for RT-PCR

| Primer name | Sequence              |
|-------------|-----------------------|
| N-cad-fw    | ACTTGCCAGAAACTCCAGG   |
| N-cad-rv    | TGGTGTATGGGGTTGATCCT  |
| E-cad-fw    | TGGATAGAGAACGCATTGCC  |
| E-cad-rv    | AAAATCCAAGCCCGTGGTG   |
| Vimentin-fw | GAGAACTTTGCCGTTGAAGC  |
| Vimentin-rv | TCTGCTGGTATATGAGTGCTG |
| Zeb1-fw     | CGGCGCAATAACGTTACAAA  |
| Zeb1-rv     | AAAGGTGTAAGTGCACAGGG  |
| Snail-fw    | GGGACTGTGAGTAATGGCTG  |
| Snail-rv    | CCCACTCCTCTATGACACCA  |
| P53-fw      | ATGTTTTGCCAACTGGCCAAG |
| P53-rv      | TGAGCAGCGCTCATGGTG    |
| Bax-fw      | ATGTTTTCTGACGGCAACTTC |
| Bax-rv      | AGTCCAATGTCCAGCCCAT   |
| Caspase3-fw | TGTTTGTGTGCTTCTGAGCC  |
| Caspase3-rv | CACGCCATGTCATCATCAAC  |
| GAPDH-fw    | GACAGTCAGCCGCATCTTCT  |
| GAPDH-rv    | GCGCCCAATACGACCAAATC  |

## Statistical Data

**Figure 2. B**

| MRC-5   | Contr | 20 $\mu$ M | 10 $\mu$ M | 5 $\mu$ M |  | A549    | Contr | 20 $\mu$ M | 10 $\mu$ M | 5 $\mu$ M |
|---------|-------|------------|------------|-----------|--|---------|-------|------------|------------|-----------|
| 1       | 0.687 | 0.412      | 0.543      | 0.677     |  | 1       | 2.16  | 0.541      | 1.109      | 1.852     |
| 2       | 0.623 | 0.396      | 0.497      | 0.669     |  | 2       | 2.05  | 0.518      | 1.146      | 1.647     |
| 3       | 0.641 | 0.331      | 0.563      | 0.656     |  | 3       | 2.15  | 0.496      | 1.011      | 1.549     |
| Mean    | 0.65  | 0.379667   | 0.534333   | 0.667333  |  | Mean    | 2.12  | 0.518333   | 1.088667   | 1.682667  |
| SD      | 0.03  | 0.04       | 0.033843   | 0.010599  |  | SD      | 0.06  | 0.02       | 0.069759   | 0.154617  |
| p-value |       | 0.000978   | 0.008028   | 0.002897  |  | p-value |       | 1.79E-06   | 0.000175   | 0.003731  |
|         |       |            |            |           |  |         |       |            |            |           |
| H460    | Contr | 20 $\mu$ M | 10 $\mu$ M | 5 $\mu$ M |  | H1299   | Contr | 20 $\mu$ M | 10 $\mu$ M | 5 $\mu$ M |
| 1       | 1.02  | 0.389      | 0.6415     | 0.869     |  | 1       | 0.312 | 0.104      | 0.157      | 0.236     |
| 2       | 1.04  | 0.357      | 0.525      | 0.932     |  | 2       | 0.362 | 0.103      | 0.162      | 0.252     |
| 3       | 1.01  | 0.316      | 0.544      | 0.911     |  | 3       | 0.331 | 0.119      | 0.179      | 0.267     |
| Mean    | 1.02  | 0.354      | 0.570167   | 0.904     |  | Mean    | 0.34  | 0.108667   | 0.166      | 0.251667  |
| SD      | 0.02  | 0.04       | 0.062503   | 0.032078  |  | SD      | 0.03  | 0.01       | 0.011533   | 0.015503  |
| p-value |       | 8.15E-06   | 0.006654   | 0.001188  |  | p-value |       | 0.000127   | 0.002445   | 0.001546  |

**Figure 2. D**

| MRC-5   | Contr  | 10 $\mu$ M |  | A549    | Contr  | 10 $\mu$ M |
|---------|--------|------------|--|---------|--------|------------|
| 1       | 213    | 215        |  | 1       | 642    | 237        |
| 2       | 264    | 206        |  | 2       | 598    | 221        |
| 3       | 234    | 234        |  | 3       | 651    | 187        |
| Mean    | 237.00 | 218.3333   |  | Mean    | 630.33 | 215        |
| SD      | 25.63  | 14.29      |  | SD      | 28.36  | 25.53      |
| p-value |        | 0.332447   |  | p-value |        | 4.66E-05   |
|         |        |            |  |         |        |            |
| H460    | Contr  | 10 $\mu$ M |  | H1299   | Contr  | 10 $\mu$ M |
| 1       | 711    | 342        |  | 1       | 652    | 245        |
| 2       | 770    | 351        |  | 2       | 619    | 251        |
| 3       | 765    | 392        |  | 3       | 701    | 266        |
| Mean    | 748.67 | 361.6667   |  | Mean    | 657.33 | 254        |
| SD      | 32.72  | 26.65      |  | SD      | 41.26  | 10.82      |
| p-value |        | 9.18E-05   |  | p-value |        | 8.14E-05   |

## Statistical Data

**Figure 3. A**

| Migration |       |            | Invasion |       |            |
|-----------|-------|------------|----------|-------|------------|
| A549      | Contr | 10 $\mu$ M | A549     | Contr | 10 $\mu$ M |
| 1         | 0.464 | 0.037      | 1        | 0.541 | 0.17       |
| 2         | 0.451 | 0.121      | 2        | 0.567 | 0.166      |
| 3         | 0.507 | 0.087      | 3        | 0.607 | 0.149      |
| Mean      | 0.47  | 0.081667   | Mean     | 0.57  | 0.161667   |
| SD        | 0.03  | 0.04       | SD       | 0.03  | 0.01       |
| p-value   |       | 0.000189   | p-value  |       | 3.51E-05   |
|           |       |            |          |       |            |
| H460      | Contr | 10 $\mu$ M | H460     | Contr | 10 $\mu$ M |
| 1         | 0.327 | 0.142      | 1        | 0.182 | 0.04       |
| 2         | 0.296 | 0.151      | 2        | 0.183 | 0.051      |
| 3         | 0.297 | 0.131      | 3        | 0.182 | 0.067      |
| Mean      | 0.31  | 0.141333   | Mean     | 0.18  | 0.052667   |
| SD        | 0.02  | 0.01       | SD       | 0.00  | 0.01       |
| p-value   |       | 0.000146   | p-value  |       | 7.85E-05   |
|           |       |            |          |       |            |
| H1299     | Contr | 10 $\mu$ M | H1299    | Contr | 10 $\mu$ M |
| 1         | 0.627 | 0.219      | 1        | 0.527 | 0.142      |
| 2         | 0.626 | 0.151      | 2        | 0.526 | 0.134      |
| 3         | 0.627 | 0.148      | 3        | 0.527 | 0.097      |
| Mean      | 0.63  | 0.172667   | Mean     | 0.53  | 0.124333   |
| SD        | 0.00  | 0.04       | SD       | 0.00  | 0.02       |
| p-value   |       | 4.01E-05   | p-value  |       | 8.39E-06   |

**Figure 5. A**

| Survial Rate of Zebrafish Embryos (%) |       |     |    |    |    |
|---------------------------------------|-------|-----|----|----|----|
| MP06 ( $\mu$ M)                       |       |     |    |    |    |
|                                       | Contr | 1   | 2  | 4  | 10 |
| 1                                     | 100   | 100 | 90 | 70 | 0  |
| 2                                     | 90    | 90  | 90 | 70 | 0  |
| 3                                     | 100   | 100 | 80 | 60 | 0  |

**Figure 5. B**

| Metastatic Rate of Zebrafish Embryos (%) |       |       |       |
|------------------------------------------|-------|-------|-------|
| MP06 ( $\mu$ M)                          |       |       |       |
|                                          | Contr | 1     | 2     |
| 1                                        | 85.71 | 66.66 | 37.5  |
| 2                                        | 75    | 62.5  | 50    |
| 3                                        | 75    | 62.5  | 33.33 |
